# Supplementary material
Source: HighWire-hosted journal article supplement (https://jech.bmj.com/content/jech-2016-207887)
Supplement: inline-supplementary-material-1 [file inline-supplementary-material-1.pdf]

**Table S1. Deficits included in calculating FI and their coding\***

| Description                                                                    | Values (1 = a deficit, 0 = no deficit) |     |
|--------------------------------------------------------------------------------|----------------------------------------|-----|
|                                                                                | No                                     | Yes |
| Difficulty walking 100 yards                                                   | 0                                      | 1   |
| Difficulty sitting 2 hours                                                     | 0                                      | 1   |
| Difficulty getting up from a chair after sitting long periods                  | 0                                      | 1   |
| Difficulty climbing several flights of stairs without resting                  | 0                                      | 1   |
| Difficulty climbing one flight of stairs without resting                       | 0                                      | 1   |
| Difficulty stooping, kneeling, or crouching                                    | 0                                      | 1   |
| Difficulty reaching or extending arms above shoulder level                     | 0                                      | 1   |
| Difficulty pulling or pushing large objects like a living room chair           | 0                                      | 1   |
| Difficulty lifting or carrying weights over 10 pounds, like a heavy bag        | 0                                      | 1   |
| Difficulty picking up a 5p coin from a table                                   | 0                                      | 1   |
| Difficulty dressing, including putting on shoes and socks                      | 0                                      | 1   |
| Difficulty walking across a room                                               | 0                                      | 1   |
| Difficulty bathing or showering                                                | 0                                      | 1   |
| Difficulty eating, such as cutting up your food                                | 0                                      | 1   |
| Difficulty getting in or out of bed                                            | 0                                      | 1   |
| Difficulty using the toilet, including getting up or down                      | 0                                      | 1   |
| Difficulty using a map to figure out how to get around in a strange place      | 0                                      | 1   |
| Difficulty preparing a hot meal                                                | 0                                      | 1   |
| Difficulty shopping for groceries                                              | 0                                      | 1   |
| Difficulty making telephone calls                                              | 0                                      | 1   |
| Difficulty taking medications                                                  | 0                                      | 1   |
| Difficulty managing money, (e.g. paying bills and keeping track of expenses)   | 0                                      | 1   |
| Difficulty doing work around the house or garden                               | 0                                      | 1   |
| Whether respondent has felt depressed much of the time during past week        | 0                                      | 1   |
| Whether respondent felt everything they did during the past week was an effort | 0                                      | 1   |
| Whether respondent felt their sleep was restless during the past week          | 0                                      | 1   |
| Whether respondent was happy much of the time during the past week             | 1                                      | 0   |
| Whether respondent felt lonely much of the time during the past week           | 0                                      | 1   |
| Whether respondent enjoyed life much of the time during the past week          | 1                                      | 0   |

|                                                                                                   |                 |                 |                 |                 |                 |
|---------------------------------------------------------------------------------------------------|-----------------|-----------------|-----------------|-----------------|-----------------|
| Whether respondent felt sad much of the time during the past week                                 | 0               |                 |                 |                 | 1               |
| Whether respondent could not get going much of the time during the past week                      | 0               |                 |                 |                 | 1               |
| High blood pressure or hypertension (self-reported)                                               | 0               |                 |                 |                 | 1               |
| Angina (self-reported)                                                                            | 0               |                 |                 |                 | 1               |
| Heart attack (including myocardial infarction or coronary thrombosis) (self-reported)             | 0               |                 |                 |                 | 1               |
| Congestive heart failure (self-reported)                                                          | 0               |                 |                 |                 | 1               |
| An abnormal heart rhythm (self-reported)                                                          | 0               |                 |                 |                 | 1               |
| Diabetes or high blood sugar (self-reported)                                                      | 0               |                 |                 |                 | 1               |
| A stroke (cerebral vascular disease) (self-reported)                                              | 0               |                 |                 |                 | 1               |
| Chronic lung disease such as chronic bronchitis or emphysema (self-reported)                      | 0               |                 |                 |                 | 1               |
| Asthma (self-reported)                                                                            | 0               |                 |                 |                 | 1               |
| Arthritis (including osteoarthritis, or rheumatism) (self-reported)                               | 0               |                 |                 |                 | 1               |
| Osteoporosis, sometimes called thin or brittle bones (self-reported)                              | 0               |                 |                 |                 | 1               |
| Cancer or a malignant tumour (excluding minor skin cancers) (self-reported)                       | 0               |                 |                 |                 | 1               |
| Parkinson's disease (self-reported)                                                               | 0               |                 |                 |                 | 1               |
| Any emotional, nervous or psychiatric problems (self-reported)                                    | 0               |                 |                 |                 | 1               |
| Alzheimer's disease (self-reported)                                                               | 0               |                 |                 |                 | 1               |
| Dementia, organic brain syndrome, senility or any other serious memory impairment (self-reported) | 0               |                 |                 |                 | 1               |
| Whether respondent has fallen down at all /last year /last 2years                                 | 0               |                 |                 |                 | 1               |
| Whether respondent has fractured hip ever /in last 2 years                                        | 0               |                 |                 |                 | 1               |
| Whether respondent has had joint replacement ever                                                 | 0               |                 |                 |                 | 1               |
| Whether respondent has had pain whilst walking                                                    | 0               |                 |                 |                 | 1               |
| Identify today's date: day of month                                                               | 1               |                 |                 |                 | 0               |
| Identify today's date: month                                                                      | 1               |                 |                 |                 | 0               |
| Identify today's date: year                                                                       | 1               |                 |                 |                 | 0               |
| Identify the day of the week                                                                      | 1               |                 |                 |                 | 0               |
|                                                                                                   | 1 <sup>st</sup> | 2 <sup>nd</sup> | 3 <sup>rd</sup> | 4 <sup>th</sup> | 5 <sup>th</sup> |
| Delayed word recall (sample organised into quintiles)                                             | 0               | 0.25            | 0.5             | 0.75            | 1               |
| Immediate word recall (sample organised into quartiles)                                           | 0               | 0.3             | 0.6             | 1               | -               |
|                                                                                                   | Excellent       | Very good       | Good            | Fair            | Poor            |
|                                                                                                   |                 |                 |                 |                 | Blind           |

---

|                                                                |   |      |     |      |     |   |
|----------------------------------------------------------------|---|------|-----|------|-----|---|
| Self-reported eyesight (while using lenses, if appropriate)    | 0 | 0.2  | 0.4 | 0.6  | 0.8 | 1 |
| Self-reported hearing (while using hearing aid if appropriate) | 0 | 0.25 | 0.5 | 0.75 | 1   | - |
| Self-reported general health                                   | 0 | 0.25 | 0.5 | 0.75 | 1   | - |

---

\*Adapted from Marshall et al [13].
