# Supplementary material
Source: HighWire-hosted journal article supplement (https://jech.bmj.com/content/jech-2016-207887)
Supplement: inline-supplementary-material-4 [file inline-supplementary-material-4.pdf]

**Table S3. Association between each covariate and FI at baseline**

| Measure                        | Women (N=2,253) |         |                   | Men (N=1,621) |         |                   |
|--------------------------------|-----------------|---------|-------------------|---------------|---------|-------------------|
|                                | Coeff.          | P-value | 95% CI            | Coeff.        | P-value | 95%CI             |
| Age                            | .003            | < .001  | (.002, .003)      | .002          | < .001  | (.001, .002)      |
| Education                      | .007            | < .001  | (.004, .009)      | .007          | < .001  | (.005, .009)      |
| Social class                   | .008            | < .001  | (.004, .011)      | .007          | < .001  | (.004, .011)      |
| Father's social class          | .008            | .029    | (.0008, .016)     | .005          | .175    | (-.002, .013)     |
| Marital history                | .002            | .604    | (-.006, .011)     | .016          | .023    | (.002, .029)      |
| Fertility history              | .0004           | .747    | (-.002, .003)     | .002          | .205    | (-.001, .005)     |
| Smoking                        | .023            | .003    | (.008, .038)      | .020          | .008    | (.005, .034)      |
| Drinking                       | -.0001          | < .001  | (-.0001, -.00006) | -.00007       | < .001  | (-.0001, -.00003) |
| Deprivation index              | .018            | < .001  | (.015, .022)      | .013          | < .001  | (.009, .018)      |
| Non-pension wealth             | -.017           | < .001  | (-.020, -.014)    | -.013         | < .001  | (-.016, -.009)    |
| Partnership                    | .036            | < .001  | (.027, .044)      | .016          | .003    | (.005, .027)      |
| Self-rated health in childhood | .017            | < .001  | (.013, .021)      | .012          | < .001  | (.007, .016)      |
